# Supplementary material
Source: PubMed Central journal article supplement (PMC521092)

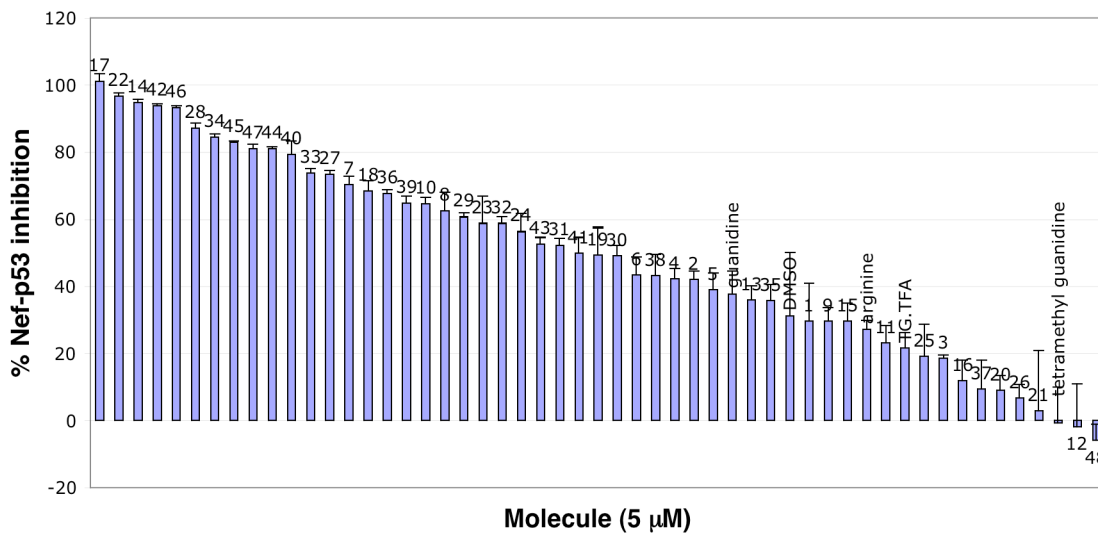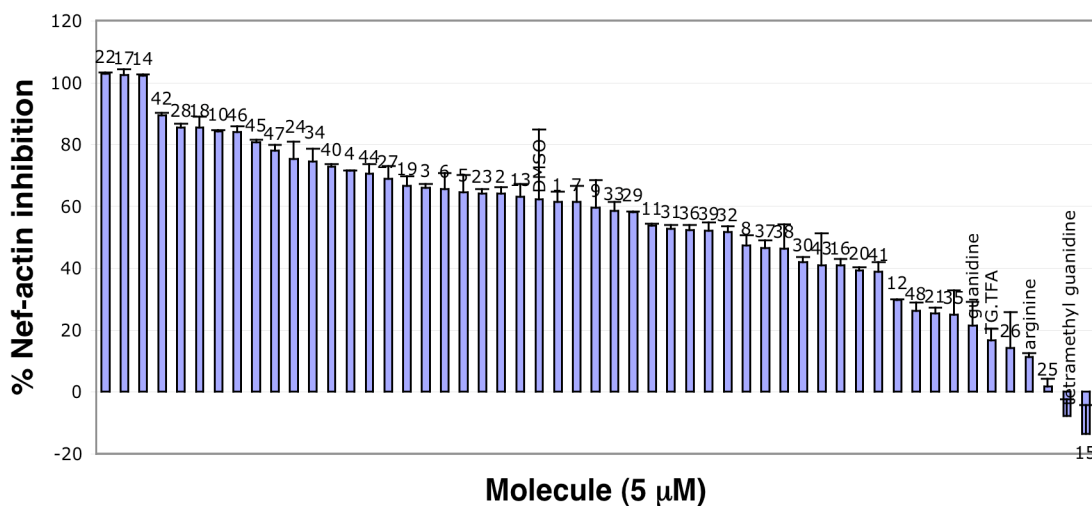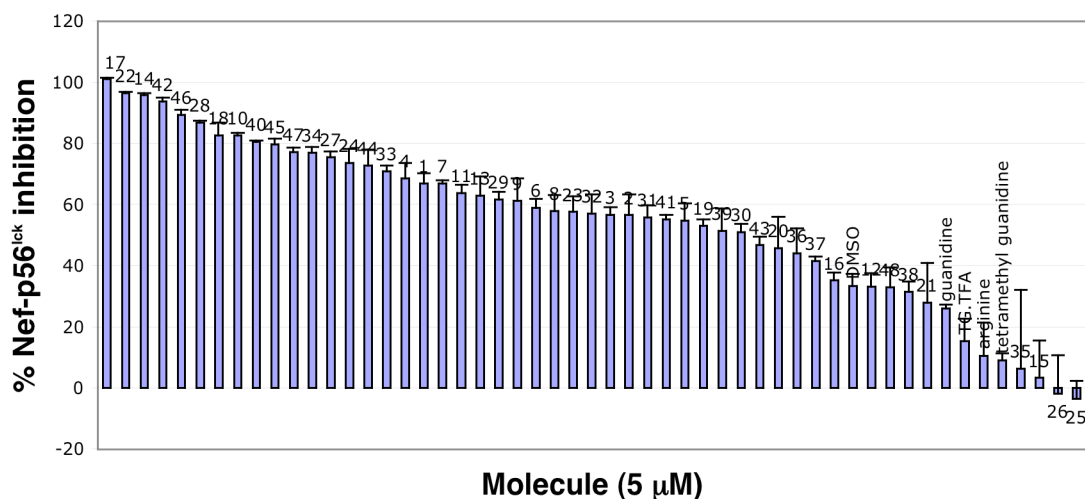

Supplement: pnas_101_39_14079__2.pdf [file pnas_101_39_14079__2.pdf]
